# Supplementary material for: Nurses’ Experience of Good Nursing Care for Terminally Ill and End-of-life Patients: The Client-Nurse, Practice, and Environment Domains
Source: PubMed Central journal article supplement — J Hosp Palliat Care. 2024 Dec 1;27(4):120–30. doi: 10.14475/jhpc.2024.27.4.120 (PMC11646822; doi:10.14475/jhpc.2024.27.4.120), 2024-12-01
Supplement: jhpc-27-4-120-supple.pdf [file jhpc-27-4-120-supple.pdf]

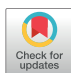

# 간호사의 말기 환자 및 임종기 환자에 대한 좋은 간호 경험: 대상자-간호사, 간호실무, 환경 영역을 중심으로

이명남, 김예진\*, 석정원\*, 왕희정<sup>†</sup>, 이현숙<sup>‡</sup>

강원대학교 간호학과, \*삼육보건대학교 간호학부, <sup>†</sup>수원여자대학교 간호학과, <sup>‡</sup>경동대학교 간호학과

## Nurses' Experience of Good Nursing Care for Terminally Ill and End-of-life Patients: The Client-Nurse, Practice, and Environment Domains

Myung-Nam Lee, R.N., Ph.D., Ye-Jean Kim, R.N., Ph.D.\*, Jung Won Suk, R.N., Ph.D.\*,  
Hee-Jung Wang, R.N., Ph.D.<sup>†</sup> and Hyunsook Zin Lee, R.N., Ph.D.<sup>‡</sup>

College of Health Science, Department of Nursing, Kangwon National University, Samcheok,

\*School of Nursing, Sahmyook Health University, Seoul,

<sup>†</sup>Department of Nursing, Suwon Women's University, Suwon,

<sup>‡</sup>College of Nursing, Kyungdong University, Wonju, Korea

**Purpose:** This study explored nurses' experience of "good nursing care" in the context of caring for terminally ill and end-of-life patients, providing a foundation for improving patient care. **Methods:** We employed a qualitative research approach, integrating both inductive and deductive analysis methods. Data collection occurred from May 1 to August 1, 2023, involving nine nurses from intensive care units, hospice and palliative care wards, and nursing homes. All participants had at least two years of experience in caring for terminally ill and end-of-life patients. Data were collected through individual in-depth interviews and analyzed using Colaizzi's six-stage phenomenological method for inductive analysis, and a deductive method based on four taxonomies: client domain, client-nurse domain, practice domain, and environment domain. **Results:** A total of 172 meaningful statements were derived, with five themes and 57 (33.14%) statements in the client-nurse domain, including three phenomena (contact, communication, and interaction); eight themes and 91 (52.91%) statements in the practice domain, including three phenomena (mentalistic, enactment, and role related phenomenon); and five themes and 24 (13.95%) statements in the environmental domain, including three phenomena (physical, social, and symbolic). **Conclusion:** The 18 themes of good nursing care, as conceived and experienced by nurses who cared for terminally ill and end-of-life patients, underscore the importance of attentive nursing care.

**Key Words:** Patients, Terminally ill, Nursing, Qualitative research

Received August 19, 2024

Revised October 10, 2024

Accepted October 17, 2024

### Correspondence to

Hee-Jung Wang

ORCID:

<https://orcid.org/0000-0002-1706-9819>

E-mail: sshwhj@naver.com

Hyunsook Zin Lee

ORCID:

<https://orcid.org/0000-0003-0578-9234>

E-mail: zinhlee@kduniv.ac.kr

## 서론

인간은 죽음이 가까워져 자신을 스스로 돌볼 수 없는 상태가 되면 누군가로부터 돌봄을 받아야 하는데, 우리나라의 특성상 말기 환자에게는 24시간 환자 옆에 있는 간호사의 역할이 중요하며 호스피스 유형별 사망 환자의 사망 장소도 입원형 호스피스 가 가장 많이 차지하고 있다[1]. 돌봄이나 간호를 받는 대상자의 의료 관련 지식이 향상되고 점차 돌봄의 질적인 면을 중요시하여 그 어느 때보다 간호사의 ‘좋은 돌봄’, ‘질적으로 우수한 간호’에 대한 요구가 높아지고 있다. 이에 의료기관 인증 조사기관에서는 [2] ‘안전한 간호, 정확한 간호’가 중요시되면서 지속적인 간호의 ‘질 향상’을 요구하고 있다.

‘좋은 간호사’에 대한 개념은 시대적으로 변화하였다. 나이팅게일 시대에는 윤리와 덕을 강조하며 충직하고 협조적인 조력자로서의 간호사를 의미하였고, 2차 세계대전 후에는 과학의 발전과 더불어 독립적인 책무를 지닌 실무가로서의 간호사, 20세기 후반에 이르러서는 간호의 본질인 돌봄을 강조하며 돌봄의 전문가로서의 간호사, 최근 21세기에 들어서는 환자 옹호자로서의 역할이 중요하다고 하였다[3]. 미래의 좋은 간호사는 자율성(autonomy), 옹호자(advocacy), 책무(accountability), 자기주장(assertiveness) 능력을 반드시 갖추어야 한다고 주장하였다[4]. 이처럼 ‘좋은 간호’에 대한 배경이 되고 기초가 되는 핵심 가치도 변화하고 있다.

특히 2024년 우리나라의 65세 이상 고령인구는 9,938천명으로 2015년에 비해 30% 이상 증가하였고, 암 발생자 수도 2021년 277,523명으로 꾸준히 증가하고 있으며, 사망률은 2013년부터 2022년까지 지속적으로 증가하고 있다[5]. 이에 죽음을 의료기관에서 맞이하는 말기 환자와 임종기 환자들이 많은데, 이들을 돌보는데 있어 ‘질적인 간호’와 ‘좋은 간호’에 대한 개념을 재정립하고 나아갈 방향을 정해야 할 필요가 증가하고 있다. 말기 환자와 임종기 환자들을 돌보는 간호사는 간호를 ‘생명연장’이라는 생의학적 관점과 ‘고통완화와 평안한 죽음’이라는 호스피스 관점에서 고민[6]하기도 하고, 고통을 경감하고 한 인격체로 삶을 잘 마무리할 수 있도록 돕는 것이 필수적이라고 생각할 수 있다. 그러나 현재 일반적인 상황에서 간호사가 바라보는 좋은 간호[7], 암환자가 의미하는 좋은 간호에 대한 연구[8,9]는 있으나 죽음을 맞이하고 있는 말기 환자, 임종기 환자를 돌보는 간호에서 ‘좋은 간호’에 관한 연구는 거의 없는 실정이다.

이에 본 연구는 곧 죽음을 앞둔 말기 환자, 임종기 환자를 돌보는 간호에서 간호사의 관점, 간호사 자신, 간호의 본질 차원에서 좋은 간호의 특성을 살펴보고자 한다. 즉, 적극적 치료에도 불구하고 근원적인 회복의 가능성도 없이 점차 증상이 악화하여 수개

월 이내 사망할 것으로 예상되는 말기 환자를 간호하는 간호사가 경험하는 ‘좋은 간호’는 무엇인지에 대해 파악하여 환자들을 위한 간호를 수행하고자 하는 기초자료로서 본 연구를 수행하고자 한다. 도출된 결과는 Kim [10]이 제시한 간호의 메타패러다임 틀(metaparadigm framework)로 네 가지 명확한 개념적 영역인 즉, 대상자, 대상자-간호사, 간호실무, 환경을 포함하는 분류체계(typology)를 통해 분석하고자 한다. 이 분류체계는 특정 경계 안에 개념과 현상을 분류하고 위치를 정하기에 유용한 분석적 도구로, 개념화(conceptualization)와 이론적 진술(theoretical statement)은 현상의 경험적 국지화(locality)에 대한 의식적 지식을 가지고 생성, 평가될 수 있다고 하였다[10]. 또한, 간호세계에 대한 관찰을 개념화하고 이론화하는 것을 돕고, 이론적 개념이 실제 간호현상에서 어떻게 구체화되는지 보여준다고 하였다[10]. 이러한 간호의 메타패러다임 틀을 이용한 분석은 간호사가 생각하는 말기 환자, 임종기 환자를 돌보는 간호에서 좋은 간호에 대한 맥락적 이해와 해석적인 통찰을 통해 임종기 환자나 말기 환자를 간호하는데 좋은 간호 수행을 위한 근거를 마련할 수 있을 것이다.

## 대상 및 방법

### 1. 연구 설계

본 연구는 간호사의 말기 환자 및 임종기 환자 간호에 있어서 좋은 간호에 대한 경험에 대해 내용 분석을 기반으로 한 귀납적 분석 방법(inductive method)과 Kim [10]의 분류체계를 바탕으로 연역적 분석 방법(deductive methods)을 이용한 질적연구 방법을 적용하였다(Figure 1).

### 2. 대상자

연구참여자는 본 연구 주제 및 목적에 근거하여 의도적 표본추출(purposive sampling)을 사용하여 말기 환자, 임종기 환자를 2년 이상 간호한 경험이 있는 중환자실 간호사, 호스피스·완화병동 간호사, 요양병원 간호사로 좋은 간호 경험의 의미와 가치에 대해 풍부한 이야기를 할 수 있고, 본 연구의 목적을 이해하고 참여에 동의한 자를 대상으로 하였다. 2년 미만의 실무경험이 있는 간호사는 대상자 선정에서 제외하였는데, 그 이유는 Benner의 ‘초보자에서 전문가로(from novice to expert)’이론에 근거하여, 간호사들은 유능자(Competent) 단계에서 ‘좋은 간호’에 대한 희열을 느끼기 시작한다는 결론에 따른 것이다[11].

연구참여자는 다양한 병동의 대상자들을 대상으로 개별 심층면담을 통하여 더 이상 새로운 개념이 도출되지 않고 자료가 포화

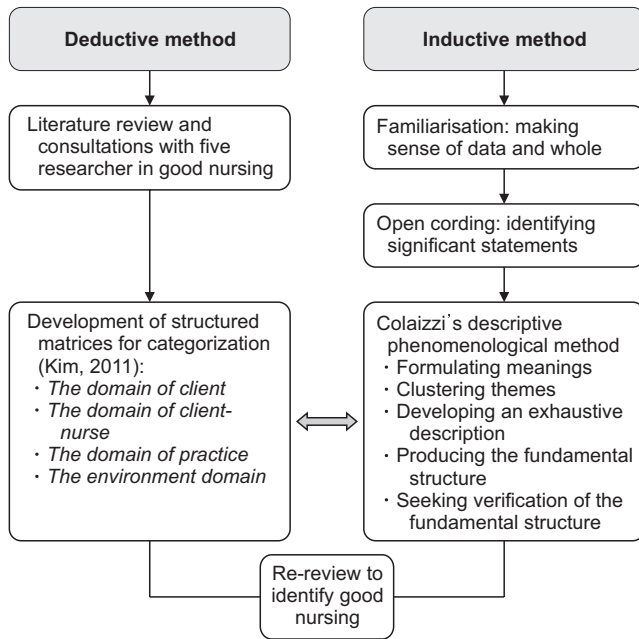

Figure 1. Research design.

될 때까지 9명을 심층면담하였다.

### 3. 윤리적 고려 및 자료수집 방법

본 연구는 연구 시작 전 연구자 소속의 K대학교 생명윤리위원회에서 연구 승인 후 자료수집을 시작하였다(No. 2023-03-005-001).

본 연구를 진행한 모든 연구자는 질적연구 관련 교육을 이수하였으며, 질적연구를 수행한 경험이 있어 본 연구를 수행할 역량을 갖추었다고 본다. 연구 관련 질문은 연구자들이 2회의 화상회의를 통해 말기 환자 및 임종기 환자를 간호하는 간호사가 경험하는 ‘좋은 간호’의 의미는 무엇인가?라는 질문을 확립하였고, 연구목적에 맞는 연구방법과 자료수집 방법에 대해서 구체적으로 상의하고 의논하여 연구자들간 차이를 줄이려고 노력하였다.

자료수집 기간은 2023년 5월 1일부터 8월 1일까지 이루어졌고, 병원 및 요양병원의 간호부의 허락 및 협조를 통해 중환자실, 호스피스·완화 병동의 말기 환자, 임종기 환자 간호 경험이 있는 2년 이상의 간호사를 모집하였다. 자료수집은 개별심층면담 방법을 사용하였는데 자연스러운 면담 분위기 조성을 위해 연구 참여자가 자유롭게 이야기할 수 있고 녹음이 가능한 편한 장소를 선택하였고, 면담 시간은 1시간에서 1시간 30분 정도였다. 면담 전 참여자에게 본 연구의 목적과 절차에 관해 설명하였으며 연구 참여자가 원하는 시간에 일상적인 가벼운 질문으로 대화를 시작하여 자기 생각을 자유롭게 편하게 진술할 수 있도록 하였다. 심층면담은 간호사가 경험하는 ‘좋은 간호’의 의미에 대한 개방형 질문으로 진행하였는데, 답변 내용에 따라 ‘왜’, ‘어떻게’, ‘무엇

을’ 등을 사용하여 다양한 후속 질문으로 질문 영역을 좁혀가며 진행하였으며 의식적으로 결론을 유도하는 질문은 하지 않았다. 구체적으로 ‘내가 생각하는 말기 환자에게 혹은 임종기 환자에게 좋은 간호는 무엇인가요? 그런 간호를 적용한 사례가 있는지요? 그때의 느낌은 어떠한가요? 말기 환자와 임종 시 환자에게 특별히 해주는 간호가 무엇인가요? 그 간호는 어떻다고 생각하는지요?’ 등과 같은 질문을 하였다. 연구참여자의 행동 및 참여자의 표정, 동작, 억양 등을 세심하게 관찰하여 분석 시 그 의미를 파악하는데 이용하였다.

### 4. 자료 분석

자료분석을 위해 귀납적 방법과 연역적 방법을 이용하였다(Figure 1). 연역적 방법으로는 간호상황에서 요소들을 체계적으로 분석하는데 사용될 수 있는 분류체계로 Kim [10]의 4가지 분류체계 즉, 대상자, 대상자-간호사 관계, 간호실무, 환경 영역의 이론적 기틀(framework)을 바탕으로 분석하였다. 연구자 모두가 각 영역이 의미하는 바를 구체적으로 이해하고 논의하는 시간을 2회에 걸쳐 수행하였다.

귀납적인 방법으로는 질적연구 분석 중 현상학적 방법으로 Colaizzi [12]의 6단계를 적용하여 참여자로부터 기술된 내용에서 명확한 의미를 찾고 현상의 본질을 정확하게 진술하도록 하였다. 본 연구의 분석 과정은 1단계로 녹음된 자료를 들으며 필사하여 참여자의 기술(protocols)을 읽고, 반복하여 자료를 읽음으로써 느낌을 얻고, 2단계는 필사 자료에서 좋은 간호 경험에 관련된 의미가 있는 진술문(significant statement)을 추출하고, 3단계로 추출된 문장과 구절의 진술로부터 보편적이며 일반적 의미로 재진술(general restatement)하고, 4단계는 의미 있는 진술문과 재진술에서 구성된 의미(fomulated meaning)를 도출하였다. 5단계로 도출된 의미를 주제(themes), 주제 모음(themecluster), 범주(categories)로 조직하는데, 범주는 연역적 방법의 4가지 틀(대상자, 대상자-간호사 관계, 간호실무, 환경 영역), 주제모음은 각 영역의 현상(phenomena)을 바탕으로 분류하였다. 각 연구자는 내용분석 전략을 사용하여 개별적으로 자료를 검토한 뒤, 유사한 내용들은 그룹화하였고 중요한 진술은 연구자 간 합의가 이루어질 때까지 반복적으로 검토하였으며 각 하위 주제(themes)가 정해졌다. 또, 범주 안에서 주제별로 분류하여 주제 모음(themecluster), 즉 현상(phenomena)을 도출하기 위해 반복적인 검토를 시행하였고, 연구자 간 불일치를 확인하고 합의를 달성하기 위해 5번의 지속적인 토론이 진행되었다. 6단계에서는 관심 있는 현상과 주제와 관련하여 완전한 진술을 최종적으로 기술(exhaustive description)하는 단계로 마지막으로 참여자에게 연구자가 도출한 결과에 대해 동의하는지 확인하였다. 추가로 각

범주에 해당하는 주제들에 대해 정량분석 방법으로 빈도와 백분율을 제시하였다.

본 연구의 엄밀성을 확보하고, 면담자가 모든 연구자가 참여하였기 때문에 아래의 기준에 따라 자료수집 하였다. Sandelowski [13]가 제시한 질적연구의 신뢰성(credibility), 적합성(fittingness), 감사가능성(auditability), 그리고 확인가능성(confirmability)을 평가 기준으로 하였다. 신뢰성(credibility)을 높이기 위해 연구참여자에게 개방형 질문과 면담으로 도출된 자료를 그대로 필사하고 분석에 이용하여 도출된 주제들이 연구결과로서 적합한지 확인하였으며, 적합성(fittingness)을 위해 충분한 자료가 나올 때까지 연구참여자와 면담을 수행하였고, 연구결과를 호스피스, 말기 환자 간호와 관련된 전문가 2인에게 검토하도록 하여 연구결과가 있을 수 있는 내용임을 확인하는 과정을 거쳤다. 감사가능성(auditability)을 확보하기 위하여 연구자는 현장 노트를 활용하여 자료수집 방법과 연구자의 참여를 포함한 자료수집 과정이 일관성 있게 진행되었는지 확인하고, 자료의 분석 과정을 다른 연구자가 추적할 수 있도록 기록하며 분석 과정을 지속적으로 재확인하였다. 마지막으로 확인가능성(confirmability)을 지키기 위해서 면담 도중에 의미가 불명확한 부분의 진술에 대해서는 연구참여자에게 질문하여 참여자가 말한 의미를 재확인하고 명료화하여 연구자의 편견이 들어가지 않고 중립성이 유지되도록 하였다.

## 결과

### 1. 대상자의 일반적 특성

연구참여자의 성별은 여자는 7명(77.78%)이었고, 평균 나이는  $38.22 \pm 12.37$ 세였으며, 6명(66.67%)이 종합병원 이상 근무하고 있었다. 평균 간호사 경력은 약 13년( $153.33 \pm 133.16$ 개월)이었으며, 1년에 대략 80명( $80.22 \pm 195.25$ 명)의 환자가 사망하는 것을 경험하는 것으로 파악되었다(Table 1).

### 2. 간호사의 말기 환자 및 임종기 환자에게 좋은 간호

참여자로부터 수집된 원 자료에서 추출한 의미 있는 진술문은 총 172개였으며, 이들 의미를 Kim [10]의 4가지 분류체계 즉, 연역적 방법으로 분류한 결과 대상자 영역은 없었고, 대상자-간호사 관계 영역은 5개의 주제(themes), 간호실무 영역은 8개의 주제(themes), 환경 영역은 5개의 주제(themes)가 도출되어 총 18개의 주제가 도출되었고, 구체적인 범주 내용은 다음과 같다 (Table 2).

### 범주 1: 대상자-간호사 영역(The Client-Nurse Domain)

대상자와 간호사 영역은 간호사가 대상자에게 다양한 접촉 방식으로 간호돌봄을 제공하는 상황에서 발생하는 간호 영역으로

Table 1. Sociodemographic Characteristics of the Participants (N=9).

| Characteristics                                                     | Categories                | Mean $\pm$ SD (min~max)      | n (%)     |
|---------------------------------------------------------------------|---------------------------|------------------------------|-----------|
| Sex                                                                 | Female                    |                              | 7 (77.78) |
|                                                                     | Male                      |                              | 2 (22.22) |
| Age                                                                 |                           | $38.22 \pm 12.37$ (26~61)    |           |
|                                                                     | 20s                       |                              | 4 (44.44) |
|                                                                     | 30s                       |                              | 2 (22.22) |
|                                                                     | >40s                      |                              | 3 (33.33) |
| Type of hospital                                                    | Tertiary general hospital |                              | 1 (11.11) |
|                                                                     | General hospital          |                              | 5 (55.55) |
|                                                                     | Primary hospital          |                              | 2 (22.22) |
|                                                                     | Long-term care hospital   |                              | 1 (11.11) |
| Current unit / workplace                                            | Hospice                   |                              | 4 (44.44) |
|                                                                     | Intensive care unit       |                              | 4 (44.44) |
|                                                                     | Other                     |                              | 1 (11.11) |
| Clinical career (mo)                                                |                           | $153.33 \pm 133.16$ (25~456) |           |
| Career in current unit (mo)                                         |                           | $83.11 \pm 83.06$ (25~264)   |           |
| Patient deaths experienced while working as a nurse (no. of people) | 20~35                     |                              | 4 (44.44) |
|                                                                     | 35~50                     |                              | 2 (22.22) |
|                                                                     | 50~100                    |                              | 1 (11.11) |
|                                                                     | $\geq 100$                |                              | 2 (22.22) |
| Patient deaths in a year (no. of people)                            |                           | $80.22 \pm 195.25$ (3~600)   |           |

접촉 현상은 9개(5.23%), 의사소통 현상은 37개(21.51%), 상호 작용 현상은 11개(6.40%), 총 57개(33.14%)의 진술문으로 3가지 유형으로 구분하였다.

### 1) 접촉 현상(contact phenomena)

간호사가 대상자에게 간호를 제공하고 대상자를 돕는 과정에서 직접 간호가 많이 행해지기 때문에 접촉은 중요한 매체물이 되며, 치료적·도구적 접촉, 거리두기 등으로 개념화할 수 있다. 접촉 현상에 포함된 2개 주제는 ‘위로적 접촉을 하며 함께하는 것’, ‘감정이입의 적정선을 유지하는 것’으로 도출되었다. 간호사가 경험한 좋은 간호는 대상자가 임종하는 동안이나 매 순간 대상자의 손을 잡는 등 심리적·영적으로 그들에게 해주고 싶었던 무언가를 하면서 혹은 그저 묵묵히라도 그들의 옆에 그냥 같이 있어주는 것이다. 그러나 간호사가 지나치게 대상자의 입장을 공감하면 적절한 간호업무를 수행하는 데 영향을 미치므로 간호사와 대상자라는 관계에서 적절한 거리를 유지하는 것이 필요하다고 하였다.

“그냥 같이 있어주는 것만으로도 그 환자한테는 얼마나 많은 힘이 되고 좋은 케어인지 모른다. 임종하는 순간 옆에 손잡아주고 같이 기도하면서 옆에 같이 있을 수 있다는 거...” (참여자 4)

“병원 직원과 환자의 관계이기 때문에 더 가까이 갈 수는 없는

선이 있지. 그런 게 가끔 있죠. 그 선은 좀 있긴 있어야 된다고 생각을 하는 게 그 선을 넘게 되면 이걸 간호사와 환자와 간호사와 보호자의 관계가 아니라 어느 순간 그들의 가족도 아닌 무언가 아닌 뭐 이런 상황이 돼버려서 상황 판단이 흐려지기도 하더라고요. 그러니까 내 감정이 너무 들어가게 돼서...” (참여자 5)

### 2) 의사소통 현상(communication phenomena)

간호사와 대상자 간의 정보나 감정 교환, 교육 등의 간호실무는 주로 의사소통을 통해 이루어지며 치료적·공감적 의사소통, 맞추기, 정보교환 등의 개념이 해당된다. 의사소통 현상에 포함된 2개 주제는 ‘공감적인 인간관계를 형성하는 것’, ‘공감적 의사소통을 하며 잘 보내주는 것’으로 도출되었다. 간호사가 경험한 좋은 간호는 간호사와 환자 관계 이전에 인간적으로 삶을 마감하는 과정에 대한 공감대를 형성하고, 대상자와 가족들이 마지막 가는 그 순간까지 후회가 남지 않도록 의미 있는 인생이었다고 잘 마무리할 수 있게 도와주는 것이다.

“주인과 손님이 서로 상호 돌보는 것이 호스피스다. 근데 저는 그게 나중에 보였어요. 그 서로라는 단어가. 저는 항상 저희가 환자한테 준다고만 생각을 하는데 굉장히 많은 걸 받고 있거든요. 특히 호스피스에서는. 왜냐하면 이 사람들은 돌아가시면서 우리한테 주는 깨우침이 너무나 많은 거예요. 어떻게 살아야 되겠구나, 이런 거를. 환자와의 관계를 통해서 뭔가를 얻어가는 게 꽤

Table 2. Nurses' Experiences of Good Nursing Care for Terminally Ill and End-of-life Patients (N=172).

| Domain               | Phenomena or concept                                                       | Themes                                                                             | n (%)                                                |            |            |
|----------------------|----------------------------------------------------------------------------|------------------------------------------------------------------------------------|------------------------------------------------------|------------|------------|
| Client-nurse         | Contact phenomena                                                          | 1.1. Stay together and provide comfort care                                        | 5 (2.90)                                             | 9 (5.23)   | 57 (33.14) |
|                      |                                                                            | 1.2. Walk a fine line between empathy and professionalism                          | 4 (2.33)                                             |            |            |
|                      | Communication phenomena                                                    | 1.3. Build an empathetic relationship (rapport)                                    | 20 (11.63)                                           | 37 (21.51) |            |
|                      |                                                                            | 1.4. Establish empathetic communication and help patients pass on without distress | 17 (9.88)                                            |            |            |
| Practice             | Interaction phenomena                                                      | 1.5. Listen to the patient's needs and negotiate flexibly                          | 11 (6.40)                                            | 11 (6.40)  | 91 (52.91) |
|                      | Mentalistic phenomenon                                                     | 2.1. Take interest in caring for patients and make clinical judgments              | 13 (7.56)                                            | 13 (7.56)  |            |
|                      |                                                                            | Enactment phenomenon                                                               | 2.2. Provide fundamental care with respect           | 13 (7.56)  |            |
|                      | 2.3. Manage the symptoms (such as pain) for the patient's comfort          |                                                                                    | 11 (6.40)                                            |            |            |
|                      | 2.4. Understand patients and provide good nursing                          |                                                                                    | 10 (5.81)                                            |            |            |
|                      | 2.5. Understand the patient's needs and provide comprehensive comfort care |                                                                                    | 14 (8.14)                                            |            |            |
|                      | 2.6. Help patients finish out their life                                   |                                                                                    | 21 (12.21)                                           |            |            |
|                      | 2.7. Explain the patient's condition thoroughly to family                  |                                                                                    | 6 (3.49)                                             |            |            |
|                      | Role related phenomenon                                                    | 2.8. Independently provide holistic nursing care                                   | 3 (1.74)                                             | 3 (1.74)   |            |
|                      | Environment                                                                | Physical environment                                                               | 3.1. Promote an appropriate environment for patients | 4 (2.33)   |            |
| Social environment   |                                                                            | 3.2. Offer support to patient and family to stay together                          | 4 (2.33)                                             | 4 (2.33)   |            |
| Symbolic environment |                                                                            | 3.3. Provide nursing care with respect                                             | 2 (1.16)                                             | 16 (9.30)  |            |
|                      |                                                                            | 3.4. Provide sincere nursing care from one's heart                                 | 6 (3.49)                                             |            |            |
|                      |                                                                            | 3.5. Ensure that patients receive the best care                                    | 8 (4.65)                                             |            |            |

많더라고요.” (참여자 9)

“지금은 가족들이 같이 있을 때 오히려 제가 의연하게 말씀드리죠. 지금 어머니 옆에 가족들 다 계시죠, 걱정 마세요, 다 지켜보고 있으니까 편안히 계시면 돼요“ 이렇게 목소리를 들려 드려서 가족들이 있는 걸 인지시켜주고 가족들이 옆에 있다 말씀드리고...” (참여자 7)

“제일 중요한 게 가족들과 얘기 나눌 수 있게 가이드를 해드립니다. (보호자 분들께) (환자는) 청력이 가장 오랫동안 남아있다. 지금도 이렇게 누워계시지만 잘 들을 수 있다. 그러니까 하고 싶었던 말 다 나누고, 인사하고 그동안 못했던 얘기 다 나누시라고 가이드 해줍니다.” (참여자 7)

### 3) 상호작용 현상(interaction phenomena)

간호사가 대상자에게 간호를 제공하는 것은 비언어적 의사소통을 포함한 상호작용을 통해 주로 일어나며 역할갈등, 롤 모델, 합의 등의 개념이 있다. 상호작용 현상에 포함된 1개 주제는 ‘요구를 반영하며 유연하게 협상하는 것’으로 도출되었다. 간호사가 경험한 좋은 간호는 호스피스적인 간호목표와 대상자나 가족들 간, 혹은 대상자와 가족들 간의 의견 충돌 등이 있을 때 의사결정을 통하여 최선의 타협점을 찾아가는 것이라고 했다.

“환자가 원하는 게 뭐고 환자가 편안하게 하는 걸로 가자. 지금 이렇게 하시면 환자가 너무 힘들 수 있다. 하지만 선택은 환자와 가족이 하는 거고 더군다나 그런 말을 했을 때 보호자들이 죄책감을 갖게 할 수도 있거든요. 그러지 않게 해야 하는 부분도 있는 거 같아요.” (참여자 7)

## 범주 2: 간호실무 영역(The Practice Domain of Nursing)

간호실무 영역은 간호업무 내에서 간호사에게 일어나는 현상으로 숙고의 단계인 정신 현상은 13개(7.56%), 실행행동 현상은 75개(43.60%), 역할관련 현상은 3개(1.74%)로 총 91개(52.91%)의 진술문으로 3가지 유형으로 구분하였으며 지식활용 현상(knowledge utilization phenomenon)은 확인되지 않았다.

### 1) 정신 현상(Mentalistic phenomenon)

간호사가 대상자에게 무엇을 할 것인지에 대해 숙고하는 단계로 사고과정이나 인지를 통해 나타나는 현상이다. 간호실무 영역에서 임상적 의사결정과 관련하여 정신 현상에 포함된 1개 주제는 ‘관심을 가지고 임상적으로 판단하는 것’으로 도출되었다. 간호사가 경험한 좋은 간호는 대상자의 편안함과 안위를 위하여 관

심을 가지고 대상자의 정보를 사정하여 미리 판단하고 결정하는 것이다.

“선임 선생님들이 간호하시는 걸 보면은 모니터를 잘 보면서 활력 징후가 어떻게 변하나 추이가 어떻게 되느냐 그걸 굉장히 예민하게 보시고 그거에 따라서 환자가 힘들구나 환자가 켜구나 그런 것들을 예민하게 알아채고 적극적으로 의사와 의사소통을 해서 또 환자의 편안함. 안위를 위해서 또 그렇게 중재하는 모습을 보고...” (참여자 1)

### 2) 실행행동 현상(Enactment phenomenon)

간호사가 실질적으로 간호업무를 수행하는 것으로 수행업무, 실행, 활동 등 간호사의 실체를 통해 나타난다. 실행행동 현상에 포함된 6개 주제는 ‘존중하는 마음으로 기본간호를 충실히 행하는 것’, ‘편안할 수 있도록 증상(통증)을 조절하는 것’, ‘대상자를 이해하고 능숙하게 간호하는 것’, ‘요구를 파악하여 온전히 돌보는 것’, ‘온전히 잘 보내주는 것’, ‘보호자에게 대상자의 상태를 세심하게 설명하는 것’으로 도출되었다. 간호사가 경험한 좋은 간호는 인간으로서 마땅히 행해야 할 기본적인 것을 누리고 편안할 수 있도록 기본간호와 통증 조절에 신경을 쓰며, 대상자의 상태변화를 빠르게 인지하여 적절한 간호를 신속하게 제공하는 것이다. 또한 대상자의 성향과 요구를 파악하여 불가능하지 않다면 최대한 그것에 맞게 해주고, 대상자가 살아온 방식에 맞추어 본인이 원하는 대로 보내주는 것이다. 가족들에게도 마지막까지 불안하지 않고 대상자와 잘 정리할 수 있도록 세심한 설명과 적절한 기회를 제공하는 것이다.

“제너럴 케어 기본적인 간호가 더욱더 중요하더라는 거죠. 그리고 임종을 앞두긴 했지만 최대한 그분이 존엄성을 가질 수 있도록 도와주는 의미가 맞을까요.” (참여자 8)

“환자가 힘들다는 게 중요해요. 증상 조절이 통증이라든가 다른 중요한 증상들이 조절이 돼야 그 다음을 생각할 수 있는 것 같긴 하거든요. 그래서 그거를 제일 우선적으로 해드리려고 하고 있고. 최대한 힘들지 않게. 환자분이 어쨌든 편한 게 중요하니까” (참여자 3)

“막상 환자의 BP가 떨어질 때 어버버 하고 대처를 잘 못하는 것보다 그렇게 응급 상황에 정말 빠른 상황 판단으로 적극적인 의사소통으로 환자를 응급 상황에서 잘 이렇게 중재를 해준다면 그게 진짜 좋은 간호사가 아닐까 물론 둘 다 가지면 더 좋겠죠.” (참여자 1)

“환자 성향을 파악하고 그 환자가 원하는 니즈에 맞게 그렇게 이분은 이런 성향이시고 까다로운 분들도 있고 죽음 직전까지 가더라도 내가 살 것이라고 생각하는 분들도 많이 있는데 그 성향에 맞게 간호하는 것이 중요하다. 그게 좋은 간호다.” (참여자 4)

“제일 중요한 건 어떻게 보면 자기 결정, 본인이 생각하는 중요한 가치에 대해서 내 마지막 죽음에 대해서 본인이 원하는 대로 보내주는 부분이 제일 중요하지 않을까 라는 생각...” (참여자 9)

“저는 확실하게 보호자들한테 어제 보셨을 때랑 오늘 보셨을 때 요런 요런 차이가 있고 이런 경과에 차이가 있다라고 간호사 기준에서만 말을 드렸을 때 보호자들이 고맙다. 그래도 이렇게 설명을 잘해줘서 고맙다. 저는 그런 데서 보호자의 안심이 된다고 생각을 해서 그 부분을, 그 부분에서 저는 솔직히 보람을 좀 느껴요.” (참여자 8)

### 3) 역할관련 현상(Role related phenomenon)

간호사가 간호업무를 수행하는 주체자로서의 역할에 대한 현상으로 의뢰, 사회화, 역할보호성, 힘, 타의료진과의 관계에 대한 협상 등이 포함된다. 역할관련 현상에 포함된 1개 주제는 ‘독립적으로 전인간호를 제공하는 것’이 도출되었다. 간호사들은 대상자에게 신체·정신적으로 전인간호를 제공하기 위해 타분야의 역할도 실시해야 하는데 이에 대한 자율성이 없고, 독립적으로 행위를 결정할 수 있는 권한이 없어 아쉽다고 하였다.

“간호사가 간호만 하면 됐지 왜 자꾸 사회복지사 업무라든가 아니면 원목수녀님 업무에 개입을 하나. 근데 거기에서 굉장히 저는 답답함을 느꼈던 게, 우리는 처음부터 배울 때 전인 간호를 배웠어요. 간호사들은. 그래서 신체적인 간호, 심리사회적 정신적 영적 간호까지. 그게 저는 이제 너무 갈등의 유발 요인이었어요.” (참여자 9)

## 범주 3: 환경 영역(The Domain of environment)

환경 영역은 대상자, 대상자-간호사, 간호실무 영역의 현상을 포괄적으로 이해하고 설명하는 기본 근거이며 물리적 환경은 4개(2.33%), 사회적 환경은 4개(2.33%), 상징적 환경은 16개(9.30%)로 3개 영역 총 24(13.95%)개의 진술문으로 구분하였다.

### 1) 물리적 환경(Physical environment)

물리적 환경은 에너지를 생성하는 관점의 생물적 요소와 물질 기반적 관점의 비생물적 요소로 구분된다. 물리적 환경에 포함된

1개 주제는 ‘적절한 환경을 조성해주는 것’이 도출되었다. 간호사들은 대상자가 삶을 잘 마무리할 수 있도록 자연 친화적인 환경이나 익숙한 환경을 조성해주고, 불안감을 일으킬 수 있는 환경은 제한해주는 것이 좋은 간호라고 하였다.

“호스피스하면서 굉장히 많이 느낀 게 정말 사람들이 자연을 좋아해요. 자연이 주는 치유력, 생각하게 해주는 거, 저는 굉장히 필요하고 그런 계기를 마련해 주는 환경 그게 되게 중요하다고 봐요. 평생 살아왔던 내 방의 채취를 맡으면서 죽는 것과는 다르게 병원의 환경 그렇잖아요. 익숙한 물건을 갖다 놓으라고. 그것도 좋은 방법 중에 하나라고 얘기하거든요.” (참여자 9)

### 2) 사회적 환경(Social environment)

사회적 환경은 사람이 서로 관계를 맺고 의사소통하는 개인이나 단체를 말하며 간호사는 대상자의 사회적 환경을 조절할 수 있다. 사회적 환경에 포함된 1개 주제는 ‘보호자와 함께할 수 있도록 배려하는 것’으로 도출되었다. 간호사들은 삶을 마무리하는 대상자가 보호자와 함께 많은 시간을 보낼 수 있도록 적절한 환경을 제공해주는 것이 좋은 간호지만 현실적으로 함께하지 못하는 상황들이 존재하고 있어 아쉽다고 하였다.

“정신적인 부분에 있어서 가능하면은 보호자와 많이 시간을 보낼 수 있는 공간과 시간을 제공해 주는 것이 좋다고 생각해요.” (참여자 8)

### 3) 상징적 환경(Symbolic environment)

상징적 환경은 사람들의 마음에만 존재하는 것으로 가치나 신념, 규칙이나 법, 조직과 사회 같은 요소로 구성된다. 환경 영역의 상징적 환경에 포함된 3개 주제는 ‘존중하는 마음을 갖는 것’, ‘진심으로 우리나라서 하는 것’, ‘최선을 다하는 것’으로 도출되었다. 간호사가 경험한 좋은 간호는 대상자를 존중하는 마음을 가지고, 그들이 자연스럽게 삶을 마무리할 수 있도록 마지막까지 진심으로 하고 싶은 간호에 최선을 다하는 것이다. 그러나 간호사 1인당 담당 환자수가 많다 보니 좋은 간호를 제공하는 데 한계가 있다고 하였다.

“환자의 존엄을 지켜 줄 수 있는, ‘결국엔 인간을 존중하는 그런 마음이 제일 중요한 것 같아요.’ (참여자 6)

“좋은 간호라고 하는 것은 내가 해야만 하는 그 간호의 행위 플러스알파가 좋은 간호인 거 같아요. 본인이 하고 싶어서 하는 거. 좋은 것을 하기 위해서는 내가 우리나라서 기쁨으로 하는 것도 있

어야 되는 거.” (참여자 4)

“최선을 다한다고 생각하고 있습니다. 지금 이 환자에게 해줄 수 있는 최선을 다하고 있는 거다. 하지만 내 최선이 이 사람에게 조그마한 도움이라도 됐으면 좋겠다고 생각하고 있습니다.” (참여자 2)

## 고찰

우리나라의 특성 상 죽음을 병원에서 맞는 경우가 많은데, 상급종합병원 간호사 중 95.8%는 말기 환자를 간호한 경험이 있는데 반해, 말기 환자에 대한 전문 교육이 부족하여[14] 다양한 증상을 가진 말기 환자를 직접 간호하게 되는 경우 여러 어려움을 겪을 수 있다고 하겠다. 특히, 인구 십 만 명당 사망률이 2019년 574.8명에서 2022년 727.6명으로 사망률이 지속적으로 증가하였는데[5], COVID-19 팬데믹으로 3차 병원에서 사망한 압환자의 임종 돌봄의 질이 저하되었다고 하였다[15]. 의료진이 격리되면 인력 감소에도 불구하고 사망자는 늘어, 말기 환자에 대한 간호의 어려움과 더불어 사회적 거리두기와 병원의 면회 제한으로 인해 환자에게는 ‘좋은 죽음’과 가족들에게는 마지막 인사를 어렵게 하였다. 이러한 이유로 COVID-19 팬데믹을 지나오면서 곧 죽음을 앞둔 말기 환자, 임종기 환자를 돌보는 간호사가 경험하는 ‘좋은 간호’는 무엇인지에 대해 파악하는 것은 더욱더 의미가 있다고 할 수 있겠다.

특히 본 연구는 질적연구방법을 적용하되 귀납적 분석 방법과 연역적 분석 방법을 함께 이용하였고, 그 중 연역적 방법으로 간호상황에서 요소들을 체계적으로 분석하는데 사용될 수 있는 Kim [10]의 4가지 분류체계의 이론적 기틀(framework)을 적용하였다. Kim [10]의 4가지 분류체계의 이론적 기틀을 바탕으로 분석한 연구를 살펴보면, 국내에서 아동간호학 분야의 연구개념 고찰연구로 대상자 영역[16]에 대한 분석, 추가로 대상자-간호사, 간호실무, 환경 영역[17] 분석 연구가 있었다. 해외 논문으로는 북유럽 국가의 간호연구의 본질에 관한 논문[18]에서 4가지 분류체계에 따라 구분하여 논문을 분석한 연구, 최근에는 키워드 네트워크 분석을 이용한 환자 안전에 대해 구분한 연구[19]가 있었다. ‘좋은 간호’ 주제로 Kim [10]의 4가지 분류체계의 이론적 기틀을 바탕으로 분석한 연구는 없어, 말기 환자와 임종기 환자에 대한 ‘좋은 간호’에 대한 현상을 개념화하고 간호의 중범위 이론을 적용하여 분석하였다는 것에 의의가 있겠다고 하겠다.

본 연구에서 대상자-간호사 영역에서 가장 많이 나타났던 것은 의사소통 현상(21.51%)으로 공감적인 인간관계(라포)를 형성(11.63%)하고, 의사소통을 하여 잘 보내주는 것(9.88%)이라고

하였다. 말기 환자와 임종기 환자이기 때문에 “임종하는 순간 가족들이 다 함께 있고, 환자에게 충분하게 이야기를 하여 잘 보내주는 것이 좋다”고 하였고, 특별히 “환자가 많은 대화를 할 수 없음에도 불구하고 간호사들도 많은 것을 주고받는다”고 하였다. Um 등[20]에서도 ‘좋은 간호’의 특성은 소통을 통한 간호와 특히 응급실에서 라포형성이 중요하고, 눈높이 공감, 공감 표현으로 안심시켜주고 공감표현하는 것이라고 하였다. 또한, 간호사의 관점에서 바라보는 ‘좋은 간호’는 간호사-대상자가 치유적 관계를 형성하고 전문성에 기초하여 완전무결하고, 자율적인 간호를 환자 중심으로 수행함으로써 대상자(환자)가 인간을 배려하는 것을 느끼며 간호사와 대상자(환자)가 모두 만족하는 간호라고 하였다[7].

대상자-간호사 영역, 간호실무 영역, 환경 영역 중 간호사가 경험한 좋은 간호는 역시 환자에게 수행하는 간호실무 영역(52.91%)으로 가장 많이 나타났다. Um 등[20]에서도 꼼꼼하고 정확하게, 빠른 행동과 반응을 통한 말보다 행동으로 보여주는 간호사가 ‘좋은 간호사’라고 하였는데, 본 연구에서도 환자를 이해하고 능숙하게 간호하는 것(5.81%)과 일맥상통할 수 있다. 본 연구에서 특별히 말기 환자와 임종기 환자를 돌보는 간호사들은 환자들의 자기 결정과 그들이 생각하는 중요한 가치에 대해 내 마지막 죽음에 대해서 본인이 원하는 대로 보내주었을 때 좋은 간호를 하였다고 생각하였다고 하여 온전히 잘 보내주는 것(12.21%)에 대해 가장 많이 진술하였고, “환자 성향을 파악하고 그 성향에 맞게 간호하는 것이 중요하다”고 하여 특별히 요구를 파악하고 온전히 돌보는 것(8.14%)에 대해서도 언급하였다. 자문형 호스피스 간호사의 경우[21] 환자와 가족 중심의 생애말기 돌봄을 제공하는데 있어, 특히 환자와 가족의 총체적 요구에 맞게 대처한다고 하였다. 혈액투석을 받는 환자의 좋은 죽음에 대한 인식[22]은 통증이 없고 기계 장치에 의존하지 않는 자연스러운 죽음 등에 초점을 두고, 의미 있는 사람과의 상호작용 속에서의 임종 및 심리적인 만족감이 포함된 친밀감, 임종까지 신체적, 정신적으로 기능할 수 있는 항목을 포함한 통제감의 순으로 제시하여 환자가 원하는 죽음을 맞이하도록 도와주는 것이 필요할 것으로 보인다. 또한, 환자들을 위한 여러 수행 중 기본간호를 충실히 행하는 것(7.56%)도 중요하지만, 말기 환자와 임종기 환자에게 가장 필요한 편안할 수 있도록 증상(통증)을 조절하는 것(6.40%)도 ‘좋은 간호’라고 하였다. 임종간호에 대한 수행과 관련된 연구[23]를 살펴보면, ‘임종기(또는 생애말기) 환자에게 구강간호, 체위변경 등을 포함한 신체적 간호를 제공한다’가 2번째, ‘임종기(또는 생애말기) 환자의 통증을 포함한 증상’에 대한 약물요법을 수행한다’가 3번째로 말기 환자와 임종기 환자에게는 통증 조절도 중요한 것으로 본 연구에서 언급된 것과 유사하게 나타났다.

환경 영역에서는 상징적 환경(9.30%)이 가장 많았고, “이 환자에게 해줄 수 있는 최선을 다하고 있으며, 내 최선이 이 사람에게 조그마한 도움이라도 됐으면 좋겠다”, “본인이 하고 싶어서 하는 것, 좋은 것을 하기 위해서는 내가 우리나라 기쁨으로 하는 것도 있어야 되는 것”이라는 최선을 다하고, 진심으로 우리나라 하는 것이 좋은 간호라고 하였다. 좋은 간호사의 가장 큰 특징은 [20] 스스로 만족하고 행복감을 느끼는데, 간호직에 만족하고, 나를 필요로 하는 사람이 많다고 느끼고, ‘병동에서 일하는 순간이 제일 편하다’라고 느끼는 간호사라고 하였다. 또한, 간호의 기본 본질로 돌아가서 말기 환자와 임종기 환자의 경우 의식이 없거나 상호작용이 덜하여 “환자의 존엄을 지켜줄 수 있는, 결국엔 인간을 존중하는 그런 마음이 제일 중요한 것 같아요”라고 존중하는 마음을 갖는 것이 필요하다고 하였다. 또, 말기 환자와 임종기 환자에게 익숙한 물건을 갖다 놓거나 자연을 느끼게 해주거나 다른 임종 환자를 보지 못하도록 적절한 환경을 조성해주고(2.33%), 간호사와 많은 시간을 보내지만 가능하다면 보호자와 많은 시간을 보낼 수 있도록 배려하는(2.33%) 것이 필요하다고 하였다.

본 연구에서 간호사들은 추가로 말기 환자와 임종기 환자에게 좋은 간호를 수행하는 데 있어 간호사당 환자수가 적어지면 상담 기록지를 쓰는 시간보다 환자에게 더 집중할 수 있고, 때로는 바빠서 환자에게 해주고 싶은 질적인 간호가 부족하고, 환경적으로 제한되어 있는 것들이 있어 아쉽다고 하였다.

본 연구를 통해 간호사가 생각하는 말기 환자, 임종기 환자를 돌보는 간호에서 좋은 간호에 대한 맥락적 이해와 해석적인 통찰을 통해 말기 환자나 임종기 환자를 간호하는데 있어 좀 더 좋은 간호 수행을 위한 근거를 마련할 수 있을 것이라 생각되며, 본 연구에서는 대상자가 9명이었으나 앞으로도 더 많은 간호사들을 대상으로 말기 환자와 임종기 환자를 돌보는 간호에 대해 파악하는 것이 필요하고, 특히 Kim [10]의 대상자, 대상자-간호사 관계, 간호실무, 환경 영역 중 대상자 영역이 나오지 않았는데, 이는 대상자 영역이 주로 대상자들이 호소하는 문제들에 대한 내용으로 기본적(essentialistic), 문제중심(problematic), 건강관리 경험(health-care experiential) 차원들로 구성되어 있기 때문이다. 또한, 본 연구는 주로 말기 환자, 임종기 환자와 간호사의 만남에서 혹은 간호를 제공하는 과정에서 일어나는 현상, 신념, 생각 등을 위주로 진술되었기 때문인 것으로 보인다. 말기 환자, 임종기 환자를 돌보는 좋은 간호의 개념을 파악하기 위해 간호를 받는 대상자, 즉 말기 환자와 임종기 환자를 대상으로 좋은 간호가 무엇인지 파악하는 것이 필요하겠다.

## 요약

**목적:** 죽음을 앞둔 말기 환자, 임종기 환자를 돌보는 간호에서 간호사가 경험하는 ‘좋은 간호’는 무엇인지에 대해 파악하여 환자들을 위한 간호를 수행하고자 하는 기초자료로서 본 연구를 수행하고자 한다.

**방법:** 내용 분석을 기반으로 한 귀납적 분석 방법과 대상자-간호사, 간호실무, 환경 영역을 중심으로 연역적 분석 방법을 이용한 질적연구 방법을 적용하여 말기 환자, 임종기 환자를 2년 이상 간호한 경험이 있는 중환자실 간호사, 호스피스·완화 병동 간호사, 요양병원 간호사 9명을 대상으로 2023년 5월 1일부터 8월 1일까지 자료수집이 이루어졌다. 자료수집은 개별심층면담 방법을 이용하였고, 자료분석은 연역적 방법으로는 대상자 영역, 대상자-간호사 관계 영역, 간호실무 영역, 환경 영역의 4가지 분류체계를 바탕으로 귀납적인 방법으로는 현상학적 방법으로 Colaizzi의 6단계를 적용하여 분석하였다.

**결과:** 총 172개의 의미 있는 진술문이 도출되었는데, 대상자-간호사 관계 영역은 접촉, 의사소통, 상호작용의 3개의 현상으로 5개의 주제(themes)와 57개(33.14%)의 진술문, 간호실무 영역은 정신, 실행 행동, 역할관련 현상의 3개의 현상으로 8개의 주제(themes)와 91개(52.91%)의 진술문, 환경 영역은 신체적, 사회적, 상징적 3개의 현상으로 5개의 주제(themes)와 24개(13.95%)의 진술문이 도출되었다.

**결론:** 말기 환자와 임종기 환자를 실제로 간호하는 간호사들이 생각하고 경험한 좋은 간호의 18개의 주제에 따라 세심한 간호를 수행하는 것이 필요할 것으로 생각한다.

**중심 단어:** 말기 환자, 임종기 환자, 좋은 간호, 질적연구

## CONFLICT OF INTEREST

No potential conflict of interest relevant to this article was reported.

## ORCID

Myung-Nam Lee, <https://orcid.org/0000-0002-7272-752X>

Ye-Jean Kim, <https://orcid.org/0000-0001-5193-344X>

Jung Won Suk, <https://orcid.org/0000-0003-0249-8757>

Hee-Jung Wang, <https://orcid.org/0000-0002-1706-9819>

Hyunsook Zin Lee, <https://orcid.org/0000-0003-0578-9234>

## AUTHOR'S CONTRIBUTIONS

Conception or design of the work: MNL. Data collection: all

authors. Data analysis and interpretation: all authors. Drafting the article: MNL, JWS, HJW, HZL. Critical revision of the

article: MNL, JWS, HJW. Final approval of the version to be published: MNL, JWS, HJW.

## REFERENCES

1. National Hospice Center & Ministry of Health and Welfare. Hospice & palliative care in Korea : Facts & figures 2023. Goyang: National Hospice Center & Ministry of Health and Welfare; 2024.
2. Korea Institute for Healthcare Accreditation. Accreditation standards and guidelines [Internet]. Seoul: Korea Institute for Healthcare Accreditation; 2021 [cited 2024 Oct 22]. Available from: [https://www.koiha.or.kr/web/kr/library/establish\\_board.do](https://www.koiha.or.kr/web/kr/library/establish_board.do).
3. Fry ST. Nursing ethics. In: Khushf G, ed. Handbook of bioethics : Taking stock of the field from a philosophical perspective. Dordrecht: Springer; 2004. p. 489–505.
4. Begley AM. On being a good nurse: reflections on the past and preparing for the future. *Int J Nurs Pract* 2010;16:525–32.
5. Statistics Korea. Korean Statistical Information Service's Top 100 Indicators [Internet]. Goyang: Ministry of Health and Welfare; 2024 [cited 2024 Oct 22]. Available from: <https://kosis.kr/visual/nsportalStats/main.do>.
6. Cho MO. Experiences of ICU nurses on temporality and spatiality in caring for dying patients. *J Qual Res* 2010;11:80–93.
7. Lee EK, Kwon SB, Cha HG, Kim HJ. The good nursing of experienced as a nurse. *KSW* 2017;12:305–17.
8. Cho NO, Hong YS, Han SS, Um YR. Attributes perceived by cancer patients as a good nurse. *J Korean Clin Nurs Res* 2006;11:149–62.
9. Suh EY, Yoo HJ, Hong JH, KWON IG, Song HJ. Good nursing experience of patients with cancer in a Korean Cancer Hospital. *Journal of Korean Critical Care Nursing* 2020;13:51–61.
10. Kim HS. The nature of theoretical thinking in nursing. 3rd ed. Seoul: HYUNMOON Publishing Co.;2011.
11. Benner P. From novice to expert. *Am J Nurs* 1982;82:402–7.
12. Colaizzi PF. Psychological research as the phenomenologist views it. In: Valle RS, King M, eds. *Existential phenomenological alternatives for psychology*. New York: Oxford University Press; 1978. p. 6.
13. Sandelowski M. The problem of rigor in qualitative research. *ANS Adv Nurs Sci* 1986;8:27–37.
14. Kim DR, Han EK, KIM SH, LEE TW, Kim KN. Factors influencing nurses' ethical decision-making regarding end-of-life care. *Korean Journal of Medical Ethics* 2014;17:34–47.
15. Shin J, Kim Y, Yoo SH, Sim JA, Keam B. Impact of COVID-19 on the end-of-life care of cancer patients who died in a Korean tertiary hospital: a retrospective study. *J Hosp Palliat Care* 2022;25:150–8.
16. Han KJ, Kim JS, Kim SY, Kim HA. An analysis of the concepts in child health nursing studies in Korea (1): from 1990 to 2000. *Child Health Nurs Res* 2002;8:449–57.
17. Han KJ, Cho KM, Kim HA, Kim JS, Kim SY. An analysis of the concepts in child health nursing studies in Korea (2): The practice, the client-nurse, the environmental domain. *Child Health Nurs Res* 2004;10:165–72.
18. Lundgren SM, Valmari G, Skott C. The nature of nursing research: dissertations in the Nordic countries, 2003. *Scand J Caring Sci* 2009;23:402–16.
19. Kim EJ, Seomun G. Exploring the knowledge structure of patient safety in nursing using a keyword network analysis. *Comput Inform Nurs* 2023;41:67–76.
20. Um YR, Song KJ, Park MH; Hospital Nurses Association. Good nurses better nursing. Seoul:HAKJISA, INC.;2017.
21. Kwon S, Byun J. Clinical experience of nurses in a consultative hospice palliative care service. *J Hosp Palliat Care* 2024;27:31–44.
22. Cho M, Na H. Factors that influence attitudes toward advance directives among hemodialysis patients. *J Hosp Palliat Care* 2024;27:11–20.
23. Jung SY, Song HS, Kim JY, Koo HJ, Shin YS, Kim SR, et al. Nurses' perception and performance of end-of-life care in a tertiary hospital. *J Hosp Palliat Care* 2023;26:101–11.
